# Supplementary material for: Validation of a quantitative instrument measuring critical success factors and acceptance of Casemix system implementation in the total hospital information system in Malaysia
Source: HighWire-hosted journal article supplement (doi:10.1136/bmjopen-2023-082547), 2024-08-01
Supplement: bmjopen-2023-082547supp004_data_supplement.pdf [file bmjopen-2023-082547supp004_data_supplement.pdf]

Supplementary File 4

Supplementary File 4a: The number of experts and its implication on the acceptable cut-off score of CVI

| Number of experts     | Acceptable CVI values | Source of recommendation               |
|-----------------------|-----------------------|----------------------------------------|
| Two experts           | At least 0.80         | (Davis 1992)                           |
| Three to five experts | Should be 1           | (Polit et al. 2007; Polit & Beck 2006) |
| At least six experts  | At least 0.83         | (Polit et al. 2007; Polit & Beck 2006) |
| Six to eight experts  | At least 0.83         | (Lynn M. R. 1986)                      |
| At least nine experts | At least 0.78         | (Lynn M. R. 1986)                      |

Resource: (Yusoff 2019)

Supplementary File 4b: The definition and formula of I-CVI, S-CVI/Ave, and S-CVI/UA

| CVI indices                                                                           | Definition                                                                                                                                                                                                                          | Formula                                                                                                                                                        |
|---------------------------------------------------------------------------------------|-------------------------------------------------------------------------------------------------------------------------------------------------------------------------------------------------------------------------------------|----------------------------------------------------------------------------------------------------------------------------------------------------------------|
| I-CVI (item-level content validity index)                                             | The proportion of content experts giving the item a relevance rating of 3 or 4                                                                                                                                                      | $I-CVI = (\text{agreed item}) / (\text{number of experts})$                                                                                                    |
| S-CVI/Ave (scale-level content validity index based)                                  | The average of the I-CVI scores for all items on the scale or the average of proportion relevance judged by all experts. The proportion relevant is the average relevance rating by individual experts.                             | $S-CVI/Ave = (\text{sum of I-CVI scores}) / (\text{number of item})$<br>$S-CVI/Ave = (\text{sum of proportion relevance rating}) / (\text{number of experts})$ |
| S-CVI/UA (scale-level content validity index based on the universal agreement method) | The proportion of items on the scale that achieve a relevance scale of 3 or 4 by all experts. Universal agreement (UA) score is given as 1 when the item achieved 100% experts in agreement, otherwise, the UA score is given as 0. | $S-CVI/UA = (\text{sum of UA scores}) / (\text{number of item})$                                                                                               |

Note: The definition and formula were based on the recommendations by (Davis 1992; Lynn M. R. 1986; Polit et al. 2007; Polit & Beck 2006) in Multimedia Appendix 2a.

Resource: (Yusoff 2019)

Supplementary File 4c: The relevance ratings on the item scale by two experts

| Item code                  | Item No. | Expert 1 | Expert 2 | Experts in Agreement | I-CVI | UA |
|----------------------------|----------|----------|----------|----------------------|-------|----|
| Gender                     | 1.1.1    | 1        | 1        | 2                    | 1     | 1  |
| Age                        | 1.1.2    | 1        | 1        | 2                    | 1     | 1  |
| Hospital's Name            | 1.1.3    | 1        | 1        | 2                    | 1     | 1  |
| Professional Roles         | 1.1.4    | 1        | 1        | 2                    | 1     | 1  |
| Educational Background     | 1.1.5    | 1        | 1        | 2                    | 1     | 1  |
| Tenure at MOH              | 1.1.6    | 1        | 1        | 2                    | 1     | 1  |
| Tenure at Current Hospital | 1.1.7    | 1        | 1        | 2                    | 1     | 1  |
| Casemix Training           | 1.1.8    | 1        | 1        | 2                    | 1     | 1  |
| K1                         | 1.2.1    | 1        | 1        | 2                    | 1     | 1  |
| K2                         | 1.2.2    | 1        | 1        | 2                    | 1     | 1  |
| K3                         | 1.2.3    | 1        | 1        | 2                    | 1     | 1  |
| K4                         | 1.2.4    | 1        | 1        | 2                    | 1     | 1  |
| K5                         | 1.2.5    | 1        | 1        | 2                    | 1     | 1  |
| K6                         | 1.2.6    | 1        | 1        | 2                    | 1     | 1  |
| K7                         | 1.2.7    | 1        | 1        | 2                    | 1     | 1  |
| K8                         | 1.2.8    | 1        | 1        | 2                    | 1     | 1  |
| K9                         | 1.2.9    | 1        | 1        | 2                    | 1     | 1  |
| K10                        | 1.2.10   | 1        | 1        | 2                    | 1     | 1  |
| PEOU1                      | 2.1.1    | 1        | 1        | 2                    | 1     | 1  |
| PEOU2                      | 2.1.2    | 1        | 1        | 2                    | 1     | 1  |
| PEOU3                      | 2.1.3    | 1        | 1        | 2                    | 1     | 1  |
| PEOU4                      | 2.1.4    | 1        | 1        | 2                    | 1     | 1  |
| PEOU5                      | 2.1.5    | 1        | 1        | 2                    | 1     | 1  |
| PU1                        | 2.2.1    | 1        | 1        | 2                    | 1     | 1  |
| PU2                        | 2.2.2    | 1        | 1        | 2                    | 1     | 1  |
| PU3                        | 2.2.3    | 1        | 1        | 2                    | 1     | 1  |
| PU4                        | 2.2.4    | 1        | 1        | 2                    | 1     | 1  |
| O1                         | 2.3.1    | 1        | 1        | 2                    | 1     | 1  |
| O2                         | 2.3.2    | 1        | 1        | 2                    | 1     | 1  |
| O3                         | 2.3.3    | 1        | 1        | 2                    | 1     | 1  |
| O4                         | 2.3.4    | 1        | 1        | 2                    | 1     | 1  |
| O5                         | 2.3.5    | 1        | 1        | 2                    | 1     | 1  |
| O6                         | 2.3.6    | 1        | 1        | 2                    | 1     | 1  |
| O7                         | 2.3.7    | 1        | 1        | 2                    | 1     | 1  |
| O8                         | 2.3.8    | 1        | 1        | 2                    | 1     | 1  |
| O9                         | 2.3.9    | 1        | 1        | 2                    | 1     | 1  |
| SY1                        | 2.4.1    | 1        | 1        | 2                    | 1     | 1  |
| SY2                        | 2.4.2    | 1        | 1        | 2                    | 1     | 1  |

|  |                                                                           |       |   |   |           |      |      |
|--|---------------------------------------------------------------------------|-------|---|---|-----------|------|------|
|  | SY3                                                                       | 2.4.3 | 1 | 1 | 2         | 1    | 1    |
|  | SY4                                                                       | 2.4.4 | 1 | 1 | 2         | 1    | 1    |
|  | IQ1                                                                       | 2.5.1 | 1 | 1 | 2         | 1    | 1    |
|  | IQ2                                                                       | 2.5.2 | 1 | 1 | 2         | 1    | 1    |
|  | IQ3                                                                       | 2.5.3 | 1 | 1 | 2         | 1    | 1    |
|  | IQ4                                                                       | 2.5.4 | 1 | 1 | 2         | 1    | 1    |
|  | IQ5                                                                       | 2.5.5 | 1 | 1 | 2         | 1    | 1    |
|  | SQ1                                                                       | 2.6.1 | 1 | 1 | 2         | 1    | 1    |
|  | SQ2                                                                       | 2.6.2 | 1 | 1 | 2         | 1    | 1    |
|  | SQ3                                                                       | 2.6.3 | 1 | 1 | 2         | 1    | 1    |
|  | SQ4                                                                       | 2.6.4 | 1 | 1 | 2         | 1    | 1    |
|  | SQ5                                                                       | 2.6.5 | 1 | 1 | 2         | 1    | 1    |
|  | ITU1                                                                      | 2.7.1 | 1 | 1 | 2         | 1    | 1    |
|  | ITU2                                                                      | 2.7.2 | 1 | 1 | 2         | 1    | 1    |
|  | ITU3                                                                      | 2.7.3 | 1 | 1 | 2         | 1    | 1    |
|  | ITU4                                                                      | 2.7.4 | 1 | 1 | 2         | 1    | 1    |
|  | ITU5                                                                      | 2.7.5 | 1 | 1 | 2         | 1    | 1    |
|  | UA1                                                                       | 3.1   | 1 | 1 | 2         | 1    | 1    |
|  | UA2                                                                       | 3.2   | 1 | 1 | 2         | 1    | 1    |
|  | UA3                                                                       | 3.3   | 1 | 1 | 2         | 1    | 1    |
|  | UA4                                                                       | 3.4   | 1 | 1 | 2         | 1    | 1    |
|  | UA5                                                                       | 3.5   | 1 | 1 | 2         | 1    | 1    |
|  |                                                                           |       |   |   | S-CVI/Ave | 1.00 |      |
|  | Proportion Relevance                                                      |       | 1 | 1 | S-CVI/UA  |      | 1.00 |
|  | The average proportion of items judged as relevant across the two experts |       |   |   | 1.00      |      |      |
